# Supplementary material
Source: Elsevier journal article supplement (https://www.sciencedirect.com/science/article/pii/S166526812030209X)
Supplement: mmc1 [file S166526812030209X:mmc1.docx]

| **Supplemental Table 1. ICD-10 Codes for respective diagnoses** | |
| --- | --- |
| Dementia | F01, F02, F03, F32, G30, G31 |
| Cardiopulmonary disease | J43, J44, I50 |
| Oxygen dependence | Z99.81, Z99.1 |
| HIV | B20 |
| Alcohol abuse | F10 (except F10.11 and F10.21) |
| Cholangiocarcinoma | C23 |
| Metastatic Neoplasm | C77, C78, C9, C80.0 |
| Non-Adherence | Z91.1, Z91.5 |
| Abbreviations: HIV, Human-Immunodeficiency Virus | |
|  |  |
|  |  |
|  |  |
|  |  |
|  |  |
